# Supplementary material
Source: PubMed Central journal article supplement (PMC2764529)
Supplement: NIHMS128164-supplement-04.pdf [file NIHMS128164-supplement-04.pdf]

## Supplemental Figures

**Figure S1.** (A) qRT-PCR analysis of RNA transcripts from thymus of WT and *Foxo4* KO mice. (B) Relative mRNA levels of FoxO family members in epithelial cell (left panel) and non-epithelial cell fractions (right panel) of colonic mucosa from WT and *Foxo4*-null mice.

**Figure S2.** IHC staining of colonic CD4<sup>+</sup> cells (dark brown) along the surface-crypt axis of WT and *Foxo4*-KO mice.

**Figure S3.** Foxo4 transcripts were detected by in situ hybridization in mouse colonic tissue sections using sense (left panel) and anti-sense (right panel) Dig-labeled oligonucleotide probes. Foxo4 is expressed in the epithelial cells (upper panel) and colonic lymphoid follicles containing T and B cells (lower panel).

**Figure S4.** TUNEL staining of apoptotic cells (red, arrows) in colonic epithelium of WT and *Foxo4*-KO mice. Nuclei were stained with DAPI (blue).

**Figure S5.** (A) Relative mRNA of Foxo4, ZO-1, and claudin-1 in intestinal epithelial cell line HT-29 transfected with either non-specific control siRNA (NSC) or Foxo4 specific siRNAs (Foxo4-1 or Foxo4-2) ( $n = 3 \pm \text{SEM}$ , \*,  $p < 0.05$ ). (B) Transmission electron micrographs of colons of WT and *Foxo4*-KO mice.

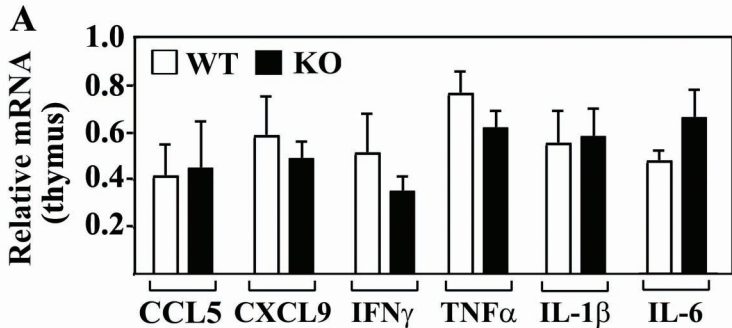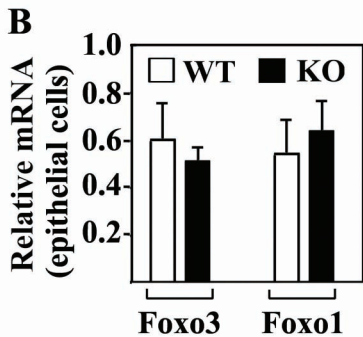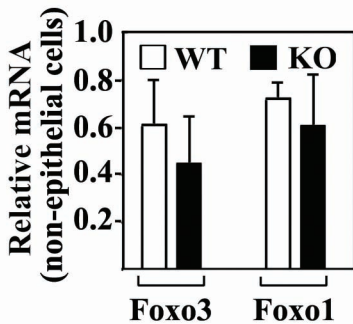

Supplemental Figure S1

**anti-CD4**

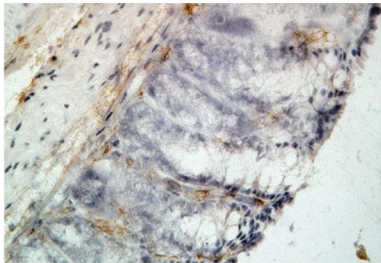

**WT**

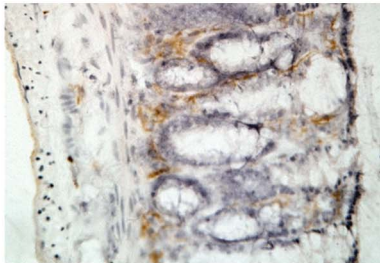

**KO**

**supplement Figure S2**

**Sense**

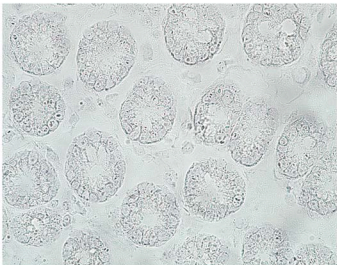

**Anti-sense**

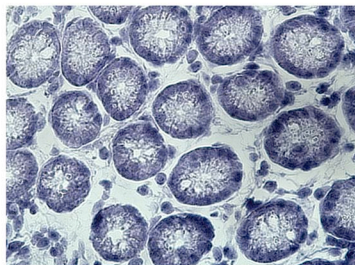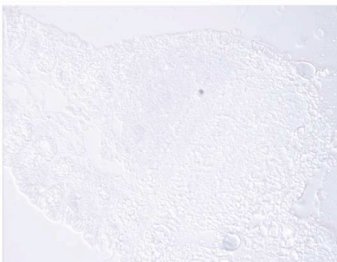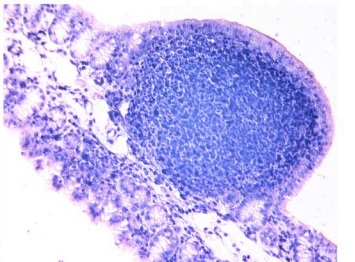

**Supplemental Figure S3**

**WT**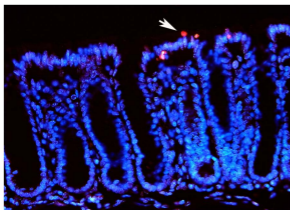**KO**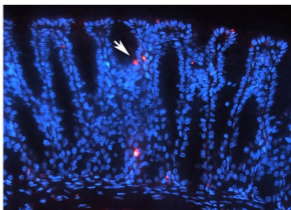

| <b>Genotype</b>                  | <b>WT (n=5)</b>                   | <b>KO (n=5)</b>                   |
|----------------------------------|-----------------------------------|-----------------------------------|
| <b>(mean<math>\pm</math>SD)%</b> | <b>0.80 <math>\pm</math> 0.16</b> | <b>1.09 <math>\pm</math> 0.18</b> |

**Supplemental Figure S4**

**A**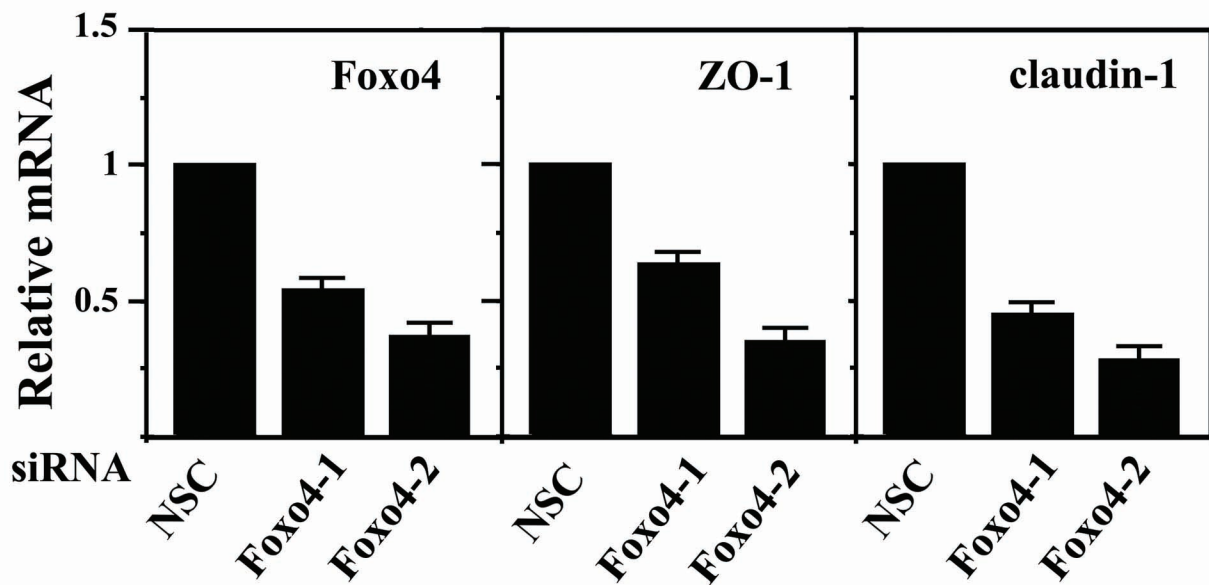**B**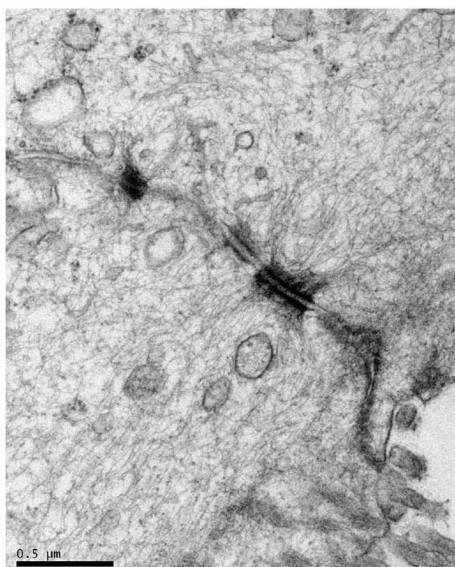**WT**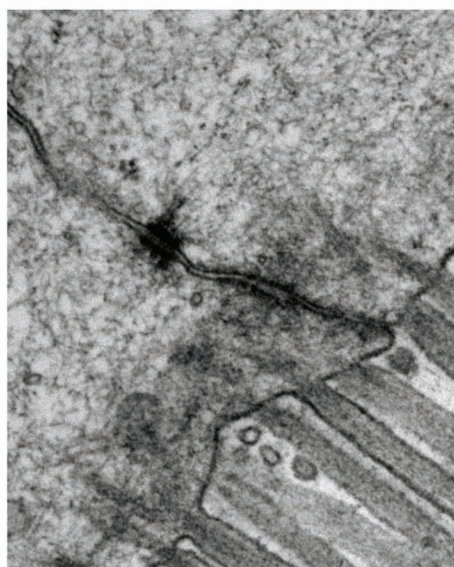**KO****Supplemental Figure S5**
